# Supplementary material for: Replicative fitness and pathogenicity of primate lentiviruses in lymphoid tissue, primary human and chimpanzee cells: relation to possible jumps to humans
Source: PubMed Central journal article supplement — eBioMedicine. 2024 Jan 12;100:104965. doi: 10.1016/j.ebiom.2023.104965 (PMC10827413; doi:10.1016/j.ebiom.2023.104965), 2024-01-12
Supplement: mmc10.pdf [file mmc10.pdf]

### 1way ANOVA (using data of Figure 4D)

Number of families 1  
 Number of comparisons per family 7  
 Alpha 0.05

| Dunnett's multiple comparisons test | Mean Diff. | 95% CI of diff.    | Significant? | Summary    |
|-------------------------------------|------------|--------------------|--------------|------------|
| SIVcpz vs. ALL                      | 0.1553     | 0.04314 to 0.2675  | Yes          | p < 0.01   |
| SIVcpz vs. GrpM                     | 0.07571    | -0.1052 to 0.2566  | No           | ns         |
| SIVcpz vs. GrpO                     | 0.5        | 0.2079 to 0.7921   | Yes          | p < 0.0001 |
| SIVcpz vs. SIVgor                   | -0.208     | -0.5001 to 0.08409 | No           | ns         |
| SIVcpz vs. GrpN                     | 0.092      | -0.2001 to 0.3841  | No           | ns         |
| SIVcpz vs. HIV-2                    | 0.4813     | 0.2475 to 0.7150   | Yes          | p < 0.0001 |
| SIVcpz vs. SIVmac                   | 0.5        | 0.1260 to 0.8740   | Yes          | p < 0.01   |

| Test details      | Mean 1 | Mean 2  | Mean Diff. | SE of diff. | n1  | n2 | q      | DF  |
|-------------------|--------|---------|------------|-------------|-----|----|--------|-----|
| SIVcpz vs. ALL    | 0.5    | 0.3447  | 0.1553     | 0.04255     | 117 | 45 | 3.651  | 194 |
| SIVcpz vs. GrpM   | 0.5    | 0.4243  | 0.07571    | 0.0686      | 117 | 14 | 1.104  | 194 |
| SIVcpz vs. GrpO   | 0.5    | 0       | 0.5        | 0.1108      | 117 | 5  | 4.514  | 194 |
| SIVcpz vs. SIVgor | 0.5    | 0.708   | -0.208     | 0.1108      | 117 | 5  | 1.878  | 194 |
| SIVcpz vs. GrpN   | 0.5    | 0.408   | 0.092      | 0.1108      | 117 | 5  | 0.8305 | 194 |
| SIVcpz vs. HIV-2  | 0.5    | 0.01875 | 0.4813     | 0.08865     | 117 | 8  | 5.429  | 194 |
| SIVcpz vs. SIVmac | 0.5    | 0       | 0.5        | 0.1418      | 117 | 3  | 3.525  | 194 |
