# Supplementary material for: Replicative fitness and pathogenicity of primate lentiviruses in lymphoid tissue, primary human and chimpanzee cells: relation to possible jumps to humans
Source: PubMed Central journal article supplement — eBioMedicine. 2024 Jan 12;100:104965. doi: 10.1016/j.ebiom.2023.104965 (PMC10827413; doi:10.1016/j.ebiom.2023.104965), 2024-01-12
Supplement: mmc11.pdf [file mmc11.pdf]

1way ANOVA ( Using data of Figure 4E)

Number of families 1  
 Number of comparisons per family 36  
 Alpha 0.05

| Tukey's multiple comparisons test |                             |              |            |                           | Test details |            |             |         |     |       |         |     |
|-----------------------------------|-----------------------------|--------------|------------|---------------------------|--------------|------------|-------------|---------|-----|-------|---------|-----|
| Mean Diff.                        | 95% CI of diff.             | Significant? | Summary    | Mean 1                    | Mean 2       | Mean Diff. | SE of diff. | n1      | n2  | q     | DF      |     |
| group M vs. group O               | 0.1247 -0.05142 to 0.3009   | No           | ns         | 0.602                     | 0.4773       | 0.1247     | 0.05652     | 121     | 59  | 3.121 | 452     |     |
| group M vs. group N               | 0.02411 -0.2330 to 0.2812   | No           | ns         | group M vs. group N       | 0.602        | 0.5779     | 0.02411     | 0.08249 | 121 | 22    | 0.4134  | 452 |
| group M vs. SIVcpz                | 0.01007 -0.1475 to 0.1676   | No           | ns         | group M vs. SIVcpz        | 0.602        | 0.592      | 0.01007     | 0.05055 | 121 | 84    | 0.2818  | 452 |
| group M vs. SIVcpz_ptt            | 0.007242 -0.1767 to 0.1912  | No           | ns         | group M vs. SIVcpz_ptt    | 0.602        | 0.5948     | 0.007242    | 0.05902 | 121 | 52    | 0.1735  | 452 |
| group M vs. SIVcpz_pts            | 0.01467 -0.2058 to 0.2352   | No           | ns         | group M vs. SIVcpz_pts    | 0.602        | 0.5874     | 0.01467     | 0.07075 | 121 | 32    | 0.2933  | 452 |
| group M vs. SIVgor                | -0.03389 -0.3017 to 0.2339  | No           | ns         | group M vs. SIVgor        | 0.602        | 0.6359     | -0.03389    | 0.08591 | 121 | 20    | 0.5579  | 452 |
| group M vs. HIV-2                 | 0.4066 0.1982 to 0.6150     | Yes          | p < 0.0001 | group M vs. HIV-2         | 0.602        | 0.1954     | 0.4066      | 0.06686 | 121 | 37    | 8.6     | 452 |
| group M vs. SIVagm/smm            | 0.383 0.1676 to 0.5983      | Yes          | p < 0.0001 | group M vs. SIVagm/smm    | 0.602        | 0.2191     | 0.383       | 0.06909 | 121 | 34    | 7.84    | 452 |
| group O vs. group N               | -0.1006 -0.3777 to 0.1765   | No           | ns         | group O vs. group N       | 0.4773       | 0.5779     | -0.1006     | 0.08891 | 59  | 22    | 1.6     | 452 |
| group O vs. SIVcpz                | -0.1147 -0.3031 to 0.07378  | No           | ns         | group O vs. SIVcpz        | 0.4773       | 0.592      | -0.1147     | 0.06046 | 59  | 84    | 2.682   | 452 |
| group O vs. SIVcpz_ptt            | -0.1175 -0.3285 to 0.09352  | No           | ns         | group O vs. SIVcpz_ptt    | 0.4773       | 0.5948     | -0.1175     | 0.0677  | 59  | 52    | 2.454   | 452 |
| group O vs. SIVcpz_pts            | -0.1101 -0.3536 to 0.1335   | No           | ns         | group O vs. SIVcpz_pts    | 0.4773       | 0.5874     | -0.1101     | 0.07814 | 59  | 32    | 1.992   | 452 |
| group O vs. SIVgor                | -0.1586 -0.4457 to 0.1284   | No           | ns         | group O vs. SIVgor        | 0.4773       | 0.6359     | -0.1586     | 0.09209 | 59  | 20    | 2.436   | 452 |
| group O vs. HIV-2                 | 0.2819 0.04924 to 0.5145    | Yes          | p < 0.01   | group O vs. HIV-2         | 0.4773       | 0.1954     | 0.2819      | 0.07464 | 59  | 37    | 5.341   | 452 |
| group O vs. SIVagm/smm            | 0.2582 0.01938 to 0.4971    | Yes          | p < 0.05   | group O vs. SIVagm/smm    | 0.4773       | 0.2191     | 0.2582      | 0.07664 | 59  | 34    | 4.766   | 452 |
| group N vs. SIVcpz                | -0.01404 -0.2797 to 0.2517  | No           | ns         | group N vs. SIVcpz        | 0.5779       | 0.592      | -0.01404    | 0.08524 | 22  | 84    | 0.2329  | 452 |
| group N vs. SIVcpz_ptt            | -0.01687 -0.2990 to 0.2653  | No           | ns         | group N vs. SIVcpz_ptt    | 0.5779       | 0.5948     | -0.01687    | 0.09052 | 22  | 52    | 0.2636  | 452 |
| group N vs. SIVcpz_pts            | -0.009439 -0.3167 to 0.2978 | No           | ns         | group N vs. SIVcpz_pts    | 0.5779       | 0.5874     | -0.009439   | 0.09857 | 22  | 32    | 0.1354  | 452 |
| group N vs. SIVgor                | -0.05801 -0.4008 to 0.2847  | No           | ns         | group N vs. SIVgor        | 0.5779       | 0.6359     | -0.05801    | 0.11    | 22  | 20    | 0.746   | 452 |
| group N vs. HIV-2                 | 0.3825 0.08383 to 0.6812    | Yes          | p < 0.01   | group N vs. HIV-2         | 0.5779       | 0.1954     | 0.3825      | 0.09582 | 22  | 37    | 5.645   | 452 |
| group N vs. SIVagm/smm            | 0.3589 0.05532 to 0.6624    | Yes          | p < 0.01   | group N vs. SIVagm/smm    | 0.5779       | 0.2191     | 0.3589      | 0.09739 | 22  | 34    | 5.211   | 452 |
| SIVcpz vs. SIVcpz_ptt             | -0.002831 -0.1986 to 0.1929 | No           | ns         | SIVcpz vs. SIVcpz_ptt     | 0.592        | 0.5948     | -0.002831   | 0.0628  | 84  | 52    | 0.06375 | 452 |
| SIVcpz vs. SIVcpz_pts             | 0.0046 -0.2259 to 0.2351    | No           | ns         | SIVcpz vs. SIVcpz_pts     | 0.592        | 0.5874     | 0.0046      | 0.07394 | 84  | 32    | 0.08799 | 452 |
| SIVcpz vs. SIVgor                 | -0.04397 -0.3200 to 0.2321  | No           | ns         | SIVcpz vs. SIVgor         | 0.592        | 0.6359     | -0.04397    | 0.08856 | 84  | 20    | 0.7021  | 452 |
| SIVcpz vs. HIV-2                  | 0.3965 0.1776 to 0.6154     | Yes          | p < 0.0001 | SIVcpz vs. HIV-2          | 0.592        | 0.1954     | 0.3965      | 0.07023 | 84  | 37    | 7.985   | 452 |
| SIVcpz vs. SIVagm/smm             | 0.3729 0.1474 to 0.5984     | Yes          | p < 0.0001 | SIVcpz vs. SIVagm/smm     | 0.592        | 0.2191     | 0.3729      | 0.07235 | 84  | 34    | 7.289   | 452 |
| SIVcpz_ptt vs. SIVcpz_pts         | 0.007431 -0.2418 to 0.2567  | No           | ns         | SIVcpz_ptt vs. SIVcpz_pts | 0.5948       | 0.5874     | 0.007431    | 0.07997 | 52  | 32    | 0.1314  | 452 |
| SIVcpz_ptt vs. SIVgor             | -0.04114 -0.3330 to 0.2508  | No           | ns         | SIVcpz_ptt vs. SIVgor     | 0.5948       | 0.6359     | -0.04114    | 0.09365 | 52  | 20    | 0.6212  | 452 |
| SIVcpz_ptt vs. HIV-2              | 0.3994 0.1608 to 0.6380     | Yes          | p < 0.0001 | SIVcpz_ptt vs. HIV-2      | 0.5948       | 0.1954     | 0.3994      | 0.07655 | 52  | 37    | 7.378   | 452 |
| SIVcpz_ptt vs. SIVagm/smm         | 0.3757 0.1311 to 0.6204     | Yes          | p < 0.0001 | SIVcpz_ptt vs. SIVagm/smm | 0.5948       | 0.2191     | 0.3757      | 0.0785  | 52  | 34    | 6.769   | 452 |
| SIVcpz_pts vs. SIVgor             | -0.04857 -0.3648 to 0.2677  | No           | ns         | SIVcpz_pts vs. SIVgor     | 0.5874       | 0.6359     | -0.04857    | 0.1015  | 32  | 20    | 0.677   | 452 |
| SIVcpz_pts vs. HIV-2              | 0.3919 0.1241 to 0.6597     | Yes          | p < 0.0001 | SIVcpz_pts vs. HIV-2      | 0.5874       | 0.1954     | 0.3919      | 0.08592 | 32  | 37    | 6.451   | 452 |
| SIVcpz_pts vs. SIVagm/smm         | 0.3683 0.09507 to 0.6415    | Yes          | p < 0.01   | SIVcpz_pts vs. SIVagm/smm | 0.5874       | 0.2191     | 0.3683      | 0.08766 | 32  | 34    | 5.942   | 452 |
| SIVgor vs. HIV-2                  | 0.4405 0.1326 to 0.7484     | Yes          | p < 0.001  | SIVgor vs. HIV-2          | 0.6359       | 0.1954     | 0.4405      | 0.09878 | 20  | 37    | 6.307   | 452 |
| SIVgor vs. SIVagm/smm             | 0.4169 0.1042 to 0.7295     | Yes          | p < 0.01   | SIVgor vs. SIVagm/smm     | 0.6359       | 0.2191     | 0.4169      | 0.1003  | 20  | 34    | 5.878   | 452 |
| HIV-2 vs. SIVagm/smm              | -0.02363 -0.2872 to 0.2399  | No           | ns         | HIV-2 vs. SIVagm/smm      | 0.1954       | 0.2191     | -0.02363    | 0.08456 | 37  | 34    | 0.3953  | 452 |
