# Supplementary material for: Replicative fitness and pathogenicity of primate lentiviruses in lymphoid tissue, primary human and chimpanzee cells: relation to possible jumps to humans
Source: PubMed Central journal article supplement — eBioMedicine. 2024 Jan 12;100:104965. doi: 10.1016/j.ebiom.2023.104965 (PMC10827413; doi:10.1016/j.ebiom.2023.104965), 2024-01-12
Supplement: mmc12.pdf [file mmc12.pdf]

### 1way ANOVA (using data of Figure 5A)

Number of families 1  
 Number of comparisons per family 2  
 Alpha 0.05

| Dunnett's multiple comparisons test | Mean Diff.    | 95% CI of diff.     | Significant?      | Summary            | Column B vs. A         | Pts vs Ptt |          |           |                                     |               |
|-------------------------------------|---------------|---------------------|-------------------|--------------------|------------------------|------------|----------|-----------|-------------------------------------|---------------|
| Group M vs. Ptt                     | -0.2988       | -0.5662 to -0.03126 | Yes               | p < 0.05           | <b>Unpaired t test</b> |            |          |           |                                     |               |
| Group M vs. Pts                     | 0.195         | -0.09392 to 0.4839  | No                | ns                 | P value                | 0.007      |          |           |                                     |               |
|                                     |               |                     |                   |                    | P value summary        | p < 0.01   |          |           |                                     |               |
| <b>Test details</b>                 | <b>Mean 1</b> | <b>Mean 2</b>       | <b>Mean Diff.</b> | <b>SE of diff.</b> | <b>n1</b>              | <b>n2</b>  | <b>q</b> | <b>DF</b> | Significantly different? (P < 0.05) | Yes           |
| Group M vs. Ptt                     | 0.5           | 0.7988              | -0.2988           | 0.112              | 8                      | 8          | 2.667    | 19        | One- or two-tailed P value?         | Two-tailed    |
| Group M vs. Pts                     | 0.5           | 0.305               | 0.195             | 0.121              | 8                      | 6          | 1.612    | 19        | t, df                               | t=3.243 df=12 |

### 1way ANOVA (using data of Figure 5B)

Number of families 1  
 Number of comparisons per family 2  
 Alpha 0.05

| Dunnett's multiple comparisons test | Mean Diff.    | 95% CI of diff.    | Significant?      | Summary            | Column B vs. A         | Pts vs Ptt |          |           |                                     |               |
|-------------------------------------|---------------|--------------------|-------------------|--------------------|------------------------|------------|----------|-----------|-------------------------------------|---------------|
| Group M vs. Ptt                     | -0.1277       | -0.2817 to 0.02628 | No                | ns                 | <b>Unpaired t test</b> |            |          |           |                                     |               |
| Group M vs. Pts                     | 0.1418        | -0.03325 to 0.3168 | No                | ns                 | P value                | 0.0156     |          |           |                                     |               |
|                                     |               |                    |                   |                    | P value summary        | p < 0.05   |          |           |                                     |               |
| <b>Test details</b>                 | <b>Mean 1</b> | <b>Mean 2</b>      | <b>Mean Diff.</b> | <b>SE of diff.</b> | <b>n1</b>              | <b>n2</b>  | <b>q</b> | <b>DF</b> | Significantly different? (P < 0.05) | Yes           |
| Group M vs. Ptt                     | 0.5           | 0.6277             | -0.1277           | 0.06824            | 32                     | 26         | 1.871    | 72        | One- or two-tailed P value?         | Two-tailed    |
| Group M vs. Pts                     | 0.5           | 0.3582             | 0.1418            | 0.07757            | 32                     | 17         | 1.828    | 72        | t, df                               | t=2.522 df=41 |
